# Supplementary material for: The protective role of sphingosine-1-phosphate against the action of the vascular disrupting agent combretastatin A-4 3-O-phosphate
Source: PubMed Central journal article supplement (PMC5707050; doi:10.18632/oncotarget.21172), 2017-09-21
Supplement: oncotarget-08-95648-s001.pdf [file oncotarget-08-95648-s001.pdf]

## The protective role of sphingosine-1-phosphate against the action of the vascular disrupting agent combretastatin A-4 3-O-phosphate

### SUPPLEMENTARY MATERIALS

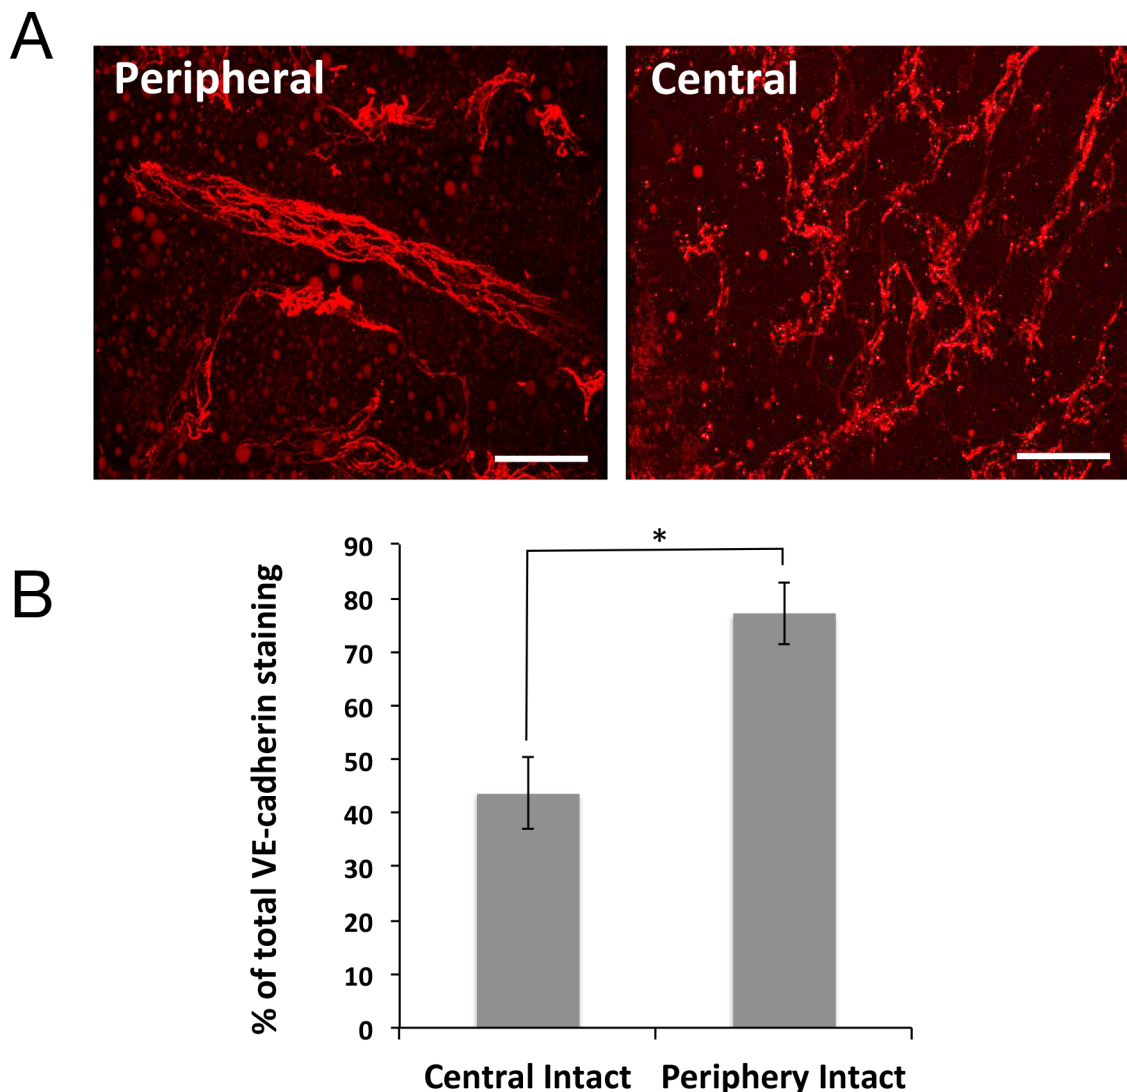

#### Supplementary Figure 1: VE-cadherin staining of microvessels in central vs peripheral areas of CA4P treated tumours.

Microvessels in the central areas of tumours displayed more disrupted VE-cadherin staining following CA4P treatment (30mg/kg) than those found in the tumour peripheries. Frozen sections from 5 tumours were stained for VE cadherin and images acquired on a confocal microscope. (A) Representative images of VE-cadherin staining in the peripheral and central tumour regions. (B) Three images per tumour were analysed by measuring the area of intact or disrupted VE-cadherin staining and calculating the totals of intact or disrupted staining as a percentage of total VE-cadherin positive area. Scale bars = 40µm, Data shown are means ± SEM, \*p=0.025 (paired t-test).

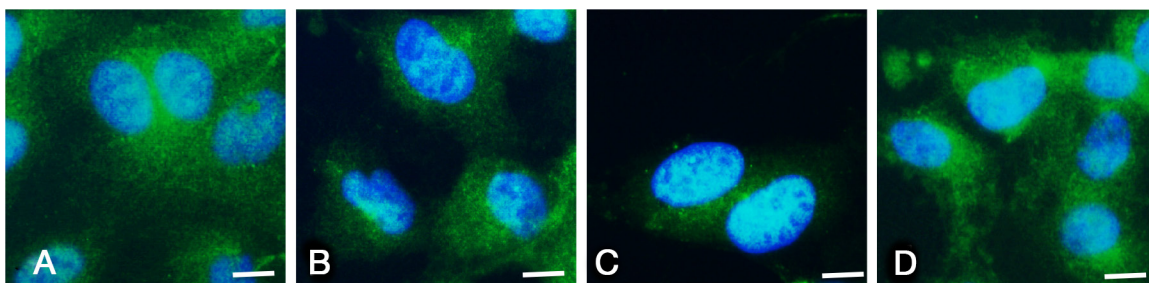

**Supplementary Figure 2:** HUVEC in monolayer were left untreated (**A**), treated with 1  $\mu$ M CA4P for 10 min (**B**) or 60 min (**C**) or pre-treated with 1  $\mu$ M S1P prior to CA4P treatment (**D**) and stained for N-cadherin (green) and cell nuclei (DAPI, blue). Scalebars = 10  $\mu$ m.
